# Supplementary material for: Kinematic flexibility allows bumblebees to increase energetic efficiency when carrying heavy loads
Source: PubMed Central journal article supplement — Sci Adv. 2020 Feb 5;6(6):eaay3115. doi: 10.1126/sciadv.aay3115 (PMC7002132; doi:10.1126/sciadv.aay3115), 2020-02-05
Supplement: aay3115_SM.pdf [file aay3115_SM.pdf]

## Supplementary Materials for

### **Kinematic flexibility allows bumblebees to increase energetic efficiency when carrying heavy loads**

Stacey A. Combes\*, Susan F. Gagliardi, Callin M. Switzer, Michael E. Dillon

\*Corresponding author. Email: [sacombes@ucdavis.edu](mailto:sacombes@ucdavis.edu)

Published 5 February 2020, *Sci. Adv.* **6**, eaay3115 (2020)

DOI: 10.1126/sciadv.aay3115

#### **This PDF file includes:**

Fig. S1. There was no relationship between stroke amplitude and wingbeat frequency or between the change in amplitude and change in frequency between trials.

Fig. S2. Change in loading between trials scaled with bee size, but change in % loading was independent of size.

Table S1. Morphological, kinematic, and metabolic variables for all bees tested, grouped by treatment order (light to heavy, L-H; heavy to light, H-L).

Table S2. Results of linear model investigating how  $\Delta$  amplitude is affected by  $\Delta$  % loading, treatment order, and bee size.

Table S3. Results from linear model investigating how  $\Delta$  frequency is affected by  $\Delta$  % loading, treatment order, and bee size.

Table S4. Results from linear model investigating how  $\Delta$  metabolic rate is affected by  $\Delta$  % loading,  $\Delta$  amplitude,  $\Delta$  frequency, treatment order, and bee size.

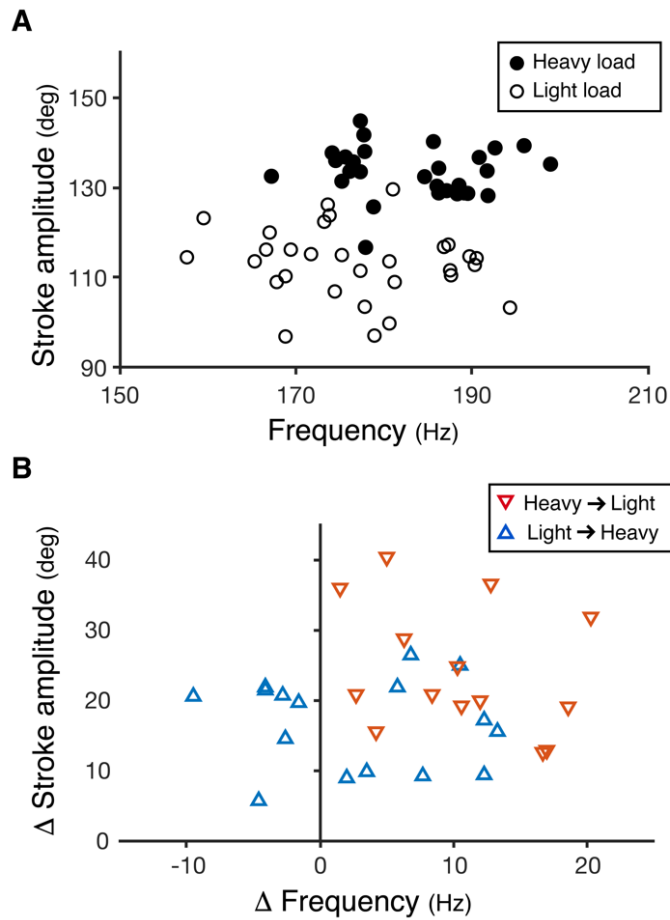

**Fig. S1. There was no relationship between stroke amplitude and wingbeat frequency or between the change in amplitude and change in frequency between trials. (A)** Measured stroke amplitude was unrelated to flapping frequency for bees in the heavy (filled circles) and light (open circles) loading treatments (heavy,  $R^2 = 0.0047$ ; light,  $R^2 = 0.0307$ ). **(B)** Individual changes in amplitude between trials (heavy – light loading) were unrelated to changes in frequency ( $R^2 = 0.0066$ ). Bees tested in the heavy to light treatment order are shown in red and those in the light to heavy order are shown in blue.

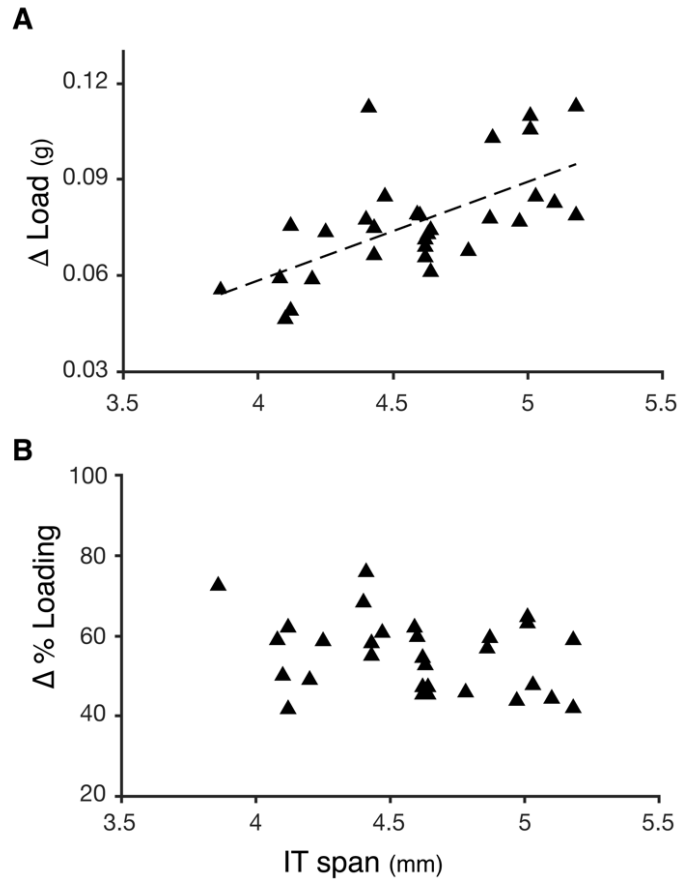

**Fig. S2. Change in loading between trials scaled with bee size, but change in % loading was independent of size.** (A) Change in absolute loading for individual bees (total mass during heavy loading – mass during light loading) increased with bee size, as measured by intertegular (IT) span ( $R^2 = 0.4016$ ). (B) Change in % loading (change in load normalized by body mass; Fig. 2) was not associated with bee size ( $R^2 = 0.0876$ ). Note that IT span (a common measure of bee size) was used as the independent variable because body mass was used in calculation of the independent variable ( $\Delta$  % loading).

**Table S1. Morphological, kinematic, and metabolic variables for all bees tested, grouped by treatment order (light to heavy, L-H; heavy to light, H-L).** Variables shown include area of one forewing ( $S_{wing}$ ), span length of one wing ( $L_{wing}$ ), raw body mass ( $m_{body}$ ), total mass with light loading ( $m_{light}$ ) and heavy loading ( $m_{heavy}$ ), stroke amplitude ( $\Phi$ ), frequency measured from audio data ( $n_{audio}$ ; used in analyses), and frequency from video data ( $n_{video}$ ).

| Bee ID          | Load order | Morphology   |                               |                 |                |                 | Light loading trials |                             |              |                  |                  | Heavy loading trials |        |                             |              |                  |                  |
|-----------------|------------|--------------|-------------------------------|-----------------|----------------|-----------------|----------------------|-----------------------------|--------------|------------------|------------------|----------------------|--------|-----------------------------|--------------|------------------|------------------|
|                 |            | IT span (mm) | $S_{wing}$ (mm <sup>2</sup> ) | $L_{wing}$ (mm) | $m_{body}$ (g) | $m_{light}$ (g) | % Load               | CO <sub>2</sub> out (mL/hr) | $\Phi$ (deg) | $n_{audio}$ (Hz) | $n_{video}$ (Hz) | $m_{heavy}$ (g)      | % Load | CO <sub>2</sub> out (mL/hr) | $\Phi$ (deg) | $n_{audio}$ (Hz) | $n_{video}$ (Hz) |
| 1               | L-H        | 4.6          | 32.3                          | 11.2            | 0.1577         | 0.1854          | 17.5                 | 10.39                       | 111.5        | 177.3            | 181.2            | 0.2597               | 64.6   | 12.54                       | 128.7        | 189.5            | 184.9            |
| 5               | L-H        | 5.0          | 35.3                          | 11.7            | 0.1755         | 0.1991          | 13.4                 | 8.98                        | 116.2        | 166.6            | 159.8            | 0.2759               | 57.2   | 12.20                       | 125.7        | 178.8            | 173.1            |
| 12              | L-H        | 4.4          | 29.9                          | 10.8            | 0.1363         | 0.1731          | 27.0                 | 10.34                       | 110.5        | 187.6            | 182.4            | 0.2481               | 82.0   | 11.43                       | 130.3        | 186.0            | 184.9            |
| 20              | L-H        | 5.2          | 36.9                          | 12.0            | 0.1886         | 0.2428          | 28.7                 | 13.43                       | 122.4        | 173.2            | 173.1            | 0.3218               | 70.6   | 14.38                       | 131.4        | 175.2            | 169.8            |
| 26              | L-H        | 4.6          | 30.8                          | 10.9            | 0.1384         | 0.1943          | 40.4                 | 10.01                       | 129.6        | 181.0            | 175.3            | 0.2672               | 93.0   | 10.37                       | 135.5        | 176.4            | 172.0            |
| 28              | L-H        | 4.8          | 31.9                          | 11.3            | 0.1472         | 0.1960          | 33.1                 | 12.24                       | 111.6        | 187.5            | 192.9            | 0.2636               | 79.1   | 14.33                       | 132.4        | 184.6            | 180.0            |
| 35              | L-H        | 4.6          | 30.5                          | 11.1            | 0.1565         | 0.1794          | 14.6                 | 9.08                        | 103.5        | 177.8            | 172.0            | 0.2506               | 60.1   | 11.42                       | 128.6        | 188.3            | 183.7            |
| 36              | L-H        | 4.4          | 29.9                          | 10.6            | 0.1147         | 0.1635          | 42.5                 | 5.51                        | 110.3        | 168.8            | 159.8            | 0.2301               | 100.6  | 7.81                        | 136.8        | 175.6            | 168.8            |
| 37              | L-H        | 4.1          | 24.1                          | 9.6             | 0.0931         | 0.1256          | 34.9                 | 5.91                        | 112.8        | 190.3            | 177.6            | 0.1723               | 85.0   | 6.53                        | 134.3        | 186.2            | 180.0            |
| 41              | L-H        | 4.3          | 27.8                          | 10.4            | 0.1258         | 0.1893          | 50.5                 | 8.99                        | 116.8        | 186.8            | 187.5            | 0.2630               | 109.1  | 10.01                       | 138.8        | 192.6            | 188.8            |
| 42              | L-H        | 4.9          | 31.4                          | 11.0            | 0.1371         | 0.2074          | 51.2                 | 11.53                       | 117.3        | 187.3            | 184.9            | 0.2853               | 108.1  | 12.28                       | 138.0        | 177.8            | 170.9            |
| 44              | L-H        | 4.2          | 27.7                          | 10.3            | 0.1200         | 0.1572          | 31.0                 | 6.41                        | 115.0        | 175.2            | 180.0            | 0.2160               | 80.0   | 10.19                       | 130.5        | 188.5            | 182.4            |
| 45              | L-H        | 5.0          | 37.3                          | 11.7            | 0.1776         | 0.2272          | 27.9                 | 11.96                       | 106.9        | 174.4            | 173.1            | 0.3120               | 75.7   | 13.64                       | 116.7        | 177.9            | 175.3            |
| 49              | L-H        | 4.1          | 28                            | 10.7            | 0.1182         | 0.1691          | 43.0                 | 10.27                       | 114.7        | 189.7            | 184.9            | 0.2184               | 84.8   | 11.13                       | 129.3        | 187.1            | 181.2            |
| 50              | L-H        | 4.6          | 31                            | 11.1            | 0.1392         | 0.2142          | 53.9                 | 11.45                       | 113.6        | 180.6            | 181.2            | 0.2800               | 101.1  | 11.52                       | 135.7        | 176.5            | 178.8            |
| 59              | L-H        | 5.1          | 39.1                          | 11.8            | 0.1868         | 0.2391          | 28.0                 | 12.83                       | 123.2        | 159.5            | 160.7            | 0.3220               | 72.4   | 15.01                       | 132.5        | 167.2            | 161.7            |
| 3               | H-L        | 4.9          | 34.6                          | 11.4            | 0.1732         | 0.2064          | 19.2                 | 9.21                        | 120.0        | 167.0            | 168.8            | 0.3093               | 78.6   | 11.78                       | 144.8        | 177.3            | 176.5            |
| 9               | H-L        | 4.4          | 24.4                          | 9.9             | 0.1135         | 0.1408          | 24.0                 | 7.58                        | 103.3        | 194.3            | 181.2            | 0.2183               | 92.3   | 9.47                        | 139.3        | 195.9            | 194.2            |
| 10              | H-L        | 4.6          | 29.6                          | 10.6            | 0.1269         | 0.1441          | 13.6                 | 7.16                        | 96.9         | 168.8            | 154.3            | 0.2133               | 68.0   | 11.03                       | 128.8        | 189.1            | 188.8            |
| 11              | H-L        | 4.6          | 29.4                          | 10.7            | 0.1350         | 0.1589          | 17.7                 | 6.81                        | 116.2        | 169.4            | 167.7            | 0.2201               | 63.0   | 10.24                       | 128.8        | 186.2            | 183.7            |
| 16              | H-L        | 5.0          | 34.5                          | 12.0            | 0.1694         | 0.1991          | 17.5                 | 9.53                        | 114.5        | 157.6            | 157.9            | 0.3089               | 82.3   | 14.26                       | 133.6        | 176.1            | 175.3            |
| 24              | H-L        | 5.0          | 31.8                          | 11.4            | 0.1670         | 0.2147          | 28.6                 | 12.33                       | 109.0        | 167.8            | 166.7            | 0.3202               | 91.7   | 15.72                       | 137.7        | 174.1            | 167.7            |
| 30              | H-L        | 4.6          | 29.7                          | 11.1            | 0.1317         | 0.1819          | 38.1                 | 9.36                        | 126.2        | 173.6            | 172.0            | 0.2607               | 97.9   | 10.94                       | 141.7        | 177.7            | 178.8            |
| 31              | H-L        | 4.5          | 33.8                          | 11.6            | 0.1395         | 0.1877          | 34.5                 | 8.79                        | 113.6        | 165.3            | 157.0            | 0.2725               | 95.3   | 11.86                       | 133.5        | 177.3            | 176.5            |
| 32              | H-L        | 4.1          | 25                            | 9.7             | 0.1008         | 0.1139          | 13.0                 | 5.51                        | 97.1         | 178.9            | 170.9            | 0.1733               | 71.9   | 7.46                        | 133.7        | 191.7            | 184.9            |
| 33              | H-L        | 4.1          | 27.5                          | 10.3            | 0.1213         | 0.1458          | 20.2                 | 7.22                        | 109.0        | 181.2            | 182.4            | 0.2213               | 82.4   | 13.08                       | 128.2        | 191.8            | 187.5            |
| 39              | H-L        | 4.4          | 31.9                          | 11.2            | 0.1480         | 0.1966          | 32.8                 | 12.91                       | 99.8         | 180.6            | 170.9            | 0.3089               | 108.7  | 15.10                       | 140.2        | 185.6            | 184.9            |
| 53              | H-L        | 5.2          | 36.6                          | 12.1            | 0.1909         | 0.2368          | 24.0                 | 13.21                       | 115.2        | 171.7            | 170.9            | 0.3495               | 83.1   | 16.48                       | 136.0        | 174.5            | 169.8            |
| 54              | H-L        | 4.6          | 29.2                          | 10.6            | 0.1274         | 0.1534          | 20.4                 | 8.39                        | 123.8        | 173.8            | 173.1            | 0.2327               | 82.6   | 11.00                       | 136.7        | 190.8            | 190.1            |
| 56              | H-L        | 3.9          | 20.1                          | 8.7             | 0.0767         | 0.1016          | 32.4                 | 7.27                        | 114.3        | 190.5            | 195.7            | 0.1572               | 104.9  | 8.45                        | 135.2        | 198.9            | 204.5            |
| <b>Mean all</b> |            | 4.6          | 30.7                          | 10.9            | 0.1411         | 0.1815          | 29.1                 | 9.48                        | 113.2        | 176.8            | 173.9            | 0.2584               | 84.2   | 11.72                       | 133.4        | 183.2            | 180.0            |
| <b>S.D. all</b> |            | 0.4          | 4.3                           | 0.8             | 0.0288         | 0.0361          | 11.6                 | 2.39                        | 8.0          | 9.6              | 10.6             | 0.0488               | 14.8   | 2.46                        | 5.5          | 7.7              | 9.0              |

(Data are also available on-line at <https://doi.org/10.5281/zenodo.2542885>)

**Table S2. Results of linear model investigating how  $\Delta$  amplitude is affected by  $\Delta$  % loading, treatment order, and bee size.** Predictors dropped due to multicollinearity or because they did not significantly predict  $\Delta$  amplitude include the following: treatment order, bee size (quantified by IT span), interaction of  $\Delta$  % loading with bee size, interaction of  $\Delta$  % loading with treatment order, and interaction of bee size with treatment order. Overall this model provides a significantly better fit than an intercept-only model –  $F(1,28) = 15.47$ ,  $p = 0.0005$ .

| Predictor          | Estimate (deg) | Std. Error | t value  | Pr(> t ) |
|--------------------|----------------|------------|----------|----------|
| (Intercept)        | -10.3904       | 7.902106   | -1.31489 | 0.1992   |
| $\Delta$ % loading | 0.556958       | 0.141597   | 3.933409 | 0.0005   |

**Table S3. Results from linear model investigating how  $\Delta$  frequency is affected by  $\Delta$  % loading, treatment order, and bee size.** The same predictors were used as for Table S2, and all were dropped except for treatment order. Overall this model provides a significantly better fit than an intercept-only model –  $F(1,28) = 9.70$ ,  $p = 0.004$ .

| Predictor             | Estimate (Hz) | Std. Error | t value | Pr(> t ) |
|-----------------------|---------------|------------|---------|----------|
| (Intercept)           | 10.4619       | 1.7946     | 5.8297  | 2.90E-06 |
| Order: light to heavy | -7.6536       | 2.4573     | -3.1146 | 0.004    |

**Table S4. Results from linear model investigating how  $\Delta$  metabolic rate is affected by  $\Delta$  % loading,  $\Delta$  amplitude,  $\Delta$  frequency, treatment order, and bee size.** Predictors dropped due to multicollinearity or because they did not predict  $\Delta$  metabolic rate include:  $\Delta$  % loading, treatment order, and bee size (IT span). We made an *a priori* decision to keep both  $\Delta$  amplitude and  $\Delta$  frequency in the final model, even if they were not significant, because these kinematic values are mathematically related to total force production (Fig. 1). Overall this model provides a significantly better fit than an intercept-only model –  $F(2,27) = 22.41$ ,  $p = 1.834e-06$ .

| Predictor          | Estimate (mL CO <sub>2</sub> * hr <sup>-1</sup> ) | Std. Error | t value | Pr(> t ) |
|--------------------|---------------------------------------------------|------------|---------|----------|
| (Intercept)        | -0.0604                                           | 0.2215     | -0.2727 | 0.7871   |
| $\Delta$ amplitude | 0.0105                                            | 0.0098     | 1.0661  | 0.2958   |
| $\Delta$ frequency | 0.071                                             | 0.0109     | 6.5014  | 5.71e-07 |
